# Supplementary material for: Machine learning prediction for mortality of patients diagnosed with COVID-19: a nationwide Korean cohort study
Source: PubMed Central journal article supplement (PMC7599238; doi:10.1038/s41598-020-75767-2), 2020-10-30

## Supplementary materials

Title: Machine learning prediction for mortality of patients diagnosed with COVID-19: a nationwide Korean cohort study

Chansik An<sup>1</sup>, Hyunsun Lim<sup>1</sup>, Dong-Wook Kim<sup>2</sup>, Jung Hyun Chang<sup>1,3</sup>, Yoon Jung Choi,<sup>1,4\*</sup> and Seong Woo Kim<sup>5</sup>

<sup>1</sup>Research Institute, National Health Insurance Service Ilsan Hospital, Goyang, Korea.

<sup>2</sup>Department of Big Data, National Health Insurance Service, Wonju, Korea.

<sup>3</sup>Department of Otolaryngology-Head and Neck Surgery, National Health Insurance Service Ilsan Hospital, Goyang, Korea.

<sup>4</sup>Department of Pathology, National Health Insurance Service Ilsan Hospital, Goyang, Korea.

<sup>5</sup>Department of Physical Medicine and Rehabilitation, National Health Insurance Service Ilsan Hospital, Goyang, Korea.

### \*Correspondence to:

Yoon Jung Choi, MD

Department of Pathology, National Health Insurance Service Ilsan Hospital, Goyang, Korea.

Phone: +82-31-900-0891; E-mail: [chris316@nhimc.or.kr](mailto:chris316@nhimc.or.kr)

### \*Current address:

Department of Pathology, Yongin Severance Hospital, Yonsei University College of Medicine, Yongin, Korea.

Phone: +82-31-5189-8447; E-mail: [chris316@yuhs.ac](mailto:chris316@yuhs.ac)

**Supplementary Table 1.** Optimal hyperparameters

| <b>Classifier</b> | <b>Mortality vs. Recovery</b>     | <b>Mortality vs. 14-day Survival</b> | <b>Mortality vs. 30-day Survival</b> |
|-------------------|-----------------------------------|--------------------------------------|--------------------------------------|
| LASSO             | Lambda = 0.0001                   | Lambda = 0.003                       | Lambda = 0.00085                     |
| Linear SVM        | C = 1                             | C = 0.5                              | C = 1                                |
| RBF-SVM           | Sigma = 0.0198<br>C = 0.5         | Sigma = 0.0194<br>C = 1              | Sigma = 0.0187<br>C = 1.2            |
| Random Forest     | No. of features = 11<br>Mtry = 15 | No. of features = 12<br>Mtry = 5     | No. of features = 9<br>Mtry = 12     |
| KNN               | K = 15                            | K = 5                                | K = 5                                |

LASSO, least absolute shrinkage and selection operator; SVM, support vector machine (SVM); RBF, radial basis function kernel; RF, random forest; KNN, k-nearest neighbors.

**Supplementary Table 2.** Operational definitions of underlying medical conditions

| <b>Medical condition</b> | <b>ICD-10 (WHO 2016)</b>                                 |
|--------------------------|----------------------------------------------------------|
| Hypertension             | I10, I11, I12, I13, I15                                  |
| Diabetes mellitus        | E10–14                                                   |
| Hyperlipidemia           | E78.0–78.5                                               |
| Cardiovascular disease   | I13, I20–25, I48–50, I26.0                               |
| Cerebrovascular disease  | I60–64, I69 (and two other conditions*)                  |
| Cancer                   | C (and hospital admission)                               |
| Lung disease or asthma   | J12–18, J41–47, J60–67, J70.1, J70.3, Z99.81             |
| Chronic renal disease    | N18, I12, I13, Z49.0–49.2, Z99.2                         |
| Mental illness           | F                                                        |
| Chronic liver disease    | B18, K70.2–70.4, K71.1, K71.3–71.5, K71.7, K72–74, Z94.4 |

A patient was considered to have an underlying medical condition if she or he had the diagnosis four times or more at least one year during the past five years.

ICD-10, the 10<sup>th</sup> revision of the International Statistical Classification of Diseases and Related Health Problems; WHO, World Health Organization

\* hospital admission and radiologic evidence on computed tomography or magnetic resonance imaging

**Supplementary Figure 1. Variable importance by LASSO and Random Forest: Mortality vs. Survival within 14 days after diagnosis**

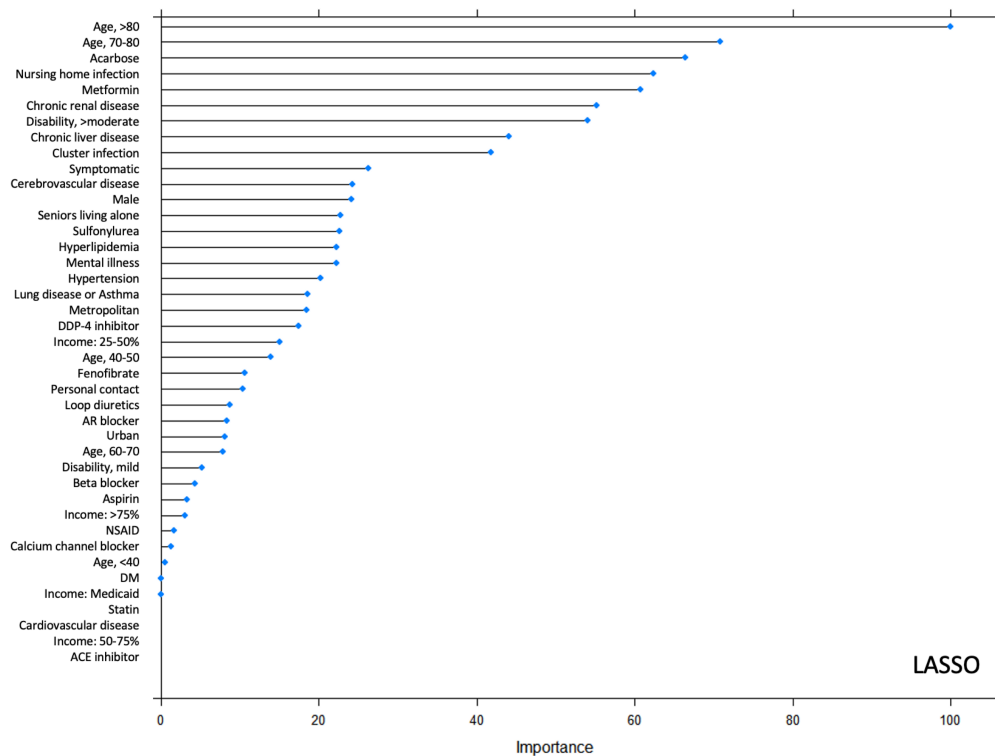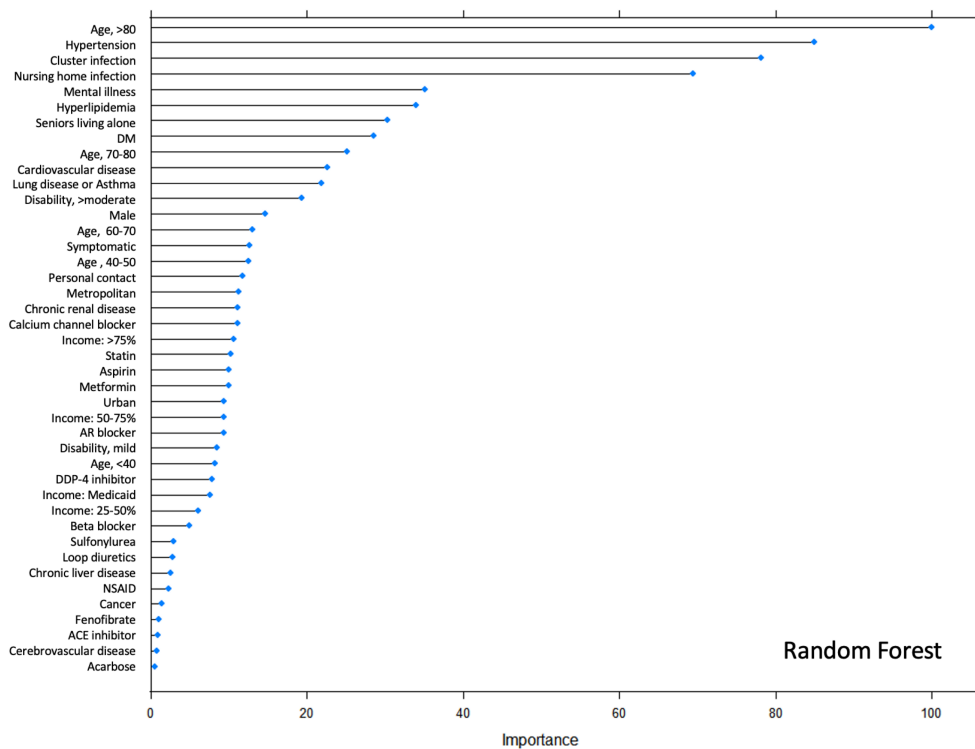

**Supplementary Figure 2.** Variable importance by LASSO and Random Forest: Mortality vs. Survival within 30 days after diagnosis

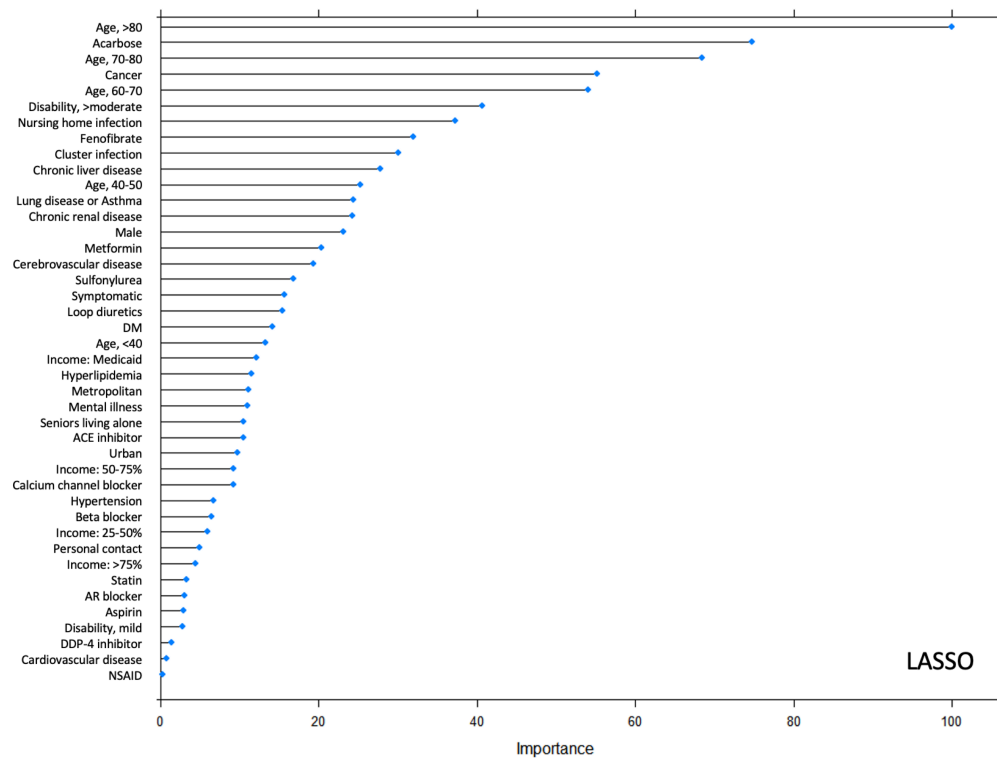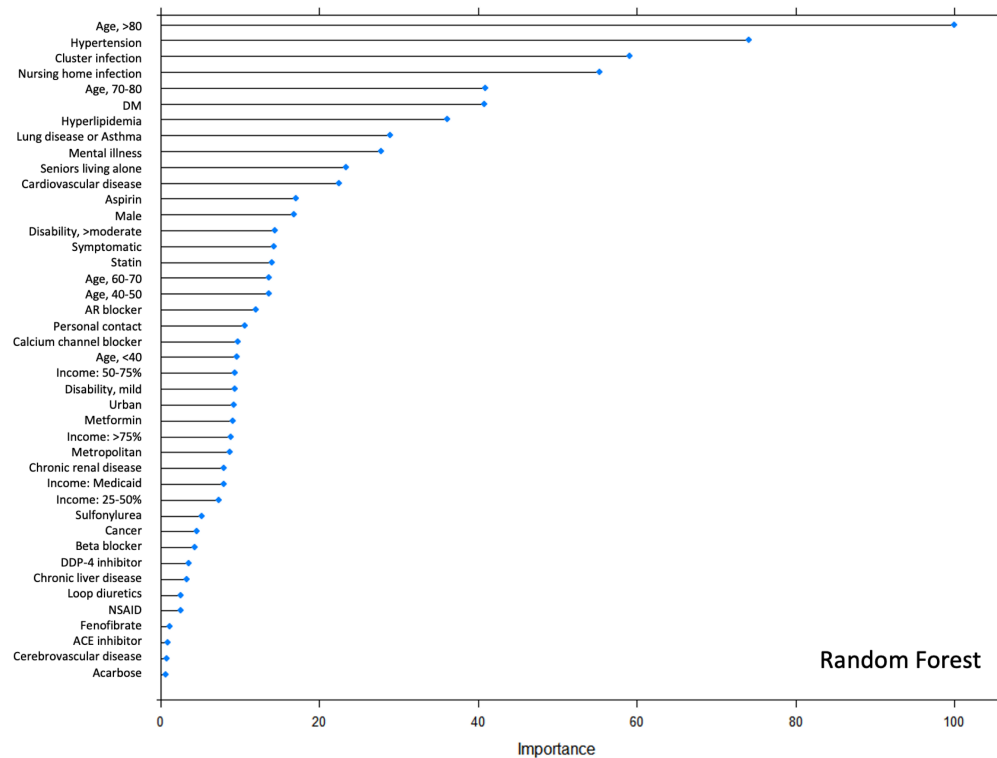

Supplement: 41598_2020_75767_MOESM1_ESM.pdf [file 41598_2020_75767_MOESM1_ESM.pdf]
